# Supplementary material for: A Multi-Omics Approach Identifies Key Hubs Associated with Cell Type-Specific Responses of Airway Epithelial Cells to Staphylococcal Alpha-Toxin
Source: PLOS journal article supplement (doi:10.1371/journal.pone.0122089), 2015-03-27

Supplementary Figure 5

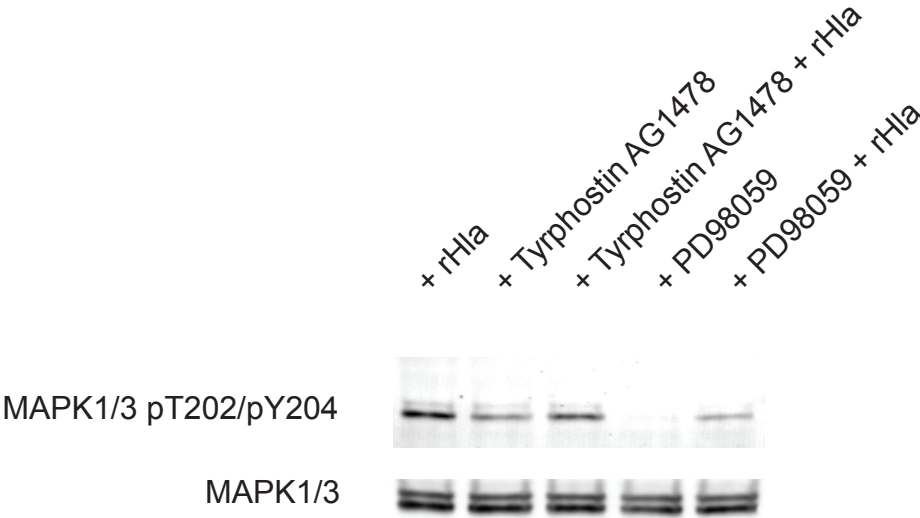

Supplement: S5 (10.1371/journal.pone.0122089.s005) [file journal.pone.0122089.s005]
